# Supplementary material
Source: publisher figshare collection journal article supplement (https://acs.figshare.com/ndownloader/files/3762700)
Supplement: Supplementary file 1 [file 3762700]

## Sheet: 7 D
	Control															Retusin 25 uM
Time	File 1	File 2	File 3	File 4	File 5	File 6	File 7	File 8	File 9	File 10	File 11	File 12			File 1	File 2	File 3	File 4	File 5	File 6	File 7	File 8	File 9	File 10	File 11	File 12	ile 13
0.01	274	281	256	274	275	292	271	303	285	323	276	265			258	331	249	291	269	287	261	304	283	279	250	275	258
0.02	279	282	263	281	277	295	274	319	290	335	282	263			262	341	254	293	274	292	265	314	287	285	258	283	259
0.03	285	289	264	284	286	309	280	328	296	340	288	268			270	344	260	301	279	302	265	318	294	293	266	283	272
0.04	296	298	270	292	295	315	287	336	306	352	295	274			277	355	269	307	289	311	285	328	302	298	273	290	272
0.05	299	305	277	300	304	326	294	346	315	363	306	281			285	364	266	318	292	323	293	340	309	306	279	296	279
0.06	308	319	283	308	312	336	302	357	325	375	315	291			297	375	286	316	301	335	304	349	318	315	287	300	284
0.07	314	321	293	310	318	337	303	365	330	389	325	293			300	382	293	337	309	345	312	362	326	323	297	306	292
0.08	323	332	294	325	331	357	138	377	341	398	334	300			310	396	303	344	314	358	326	376	333	332	301	316	301
0.09	330	341	303	334	341	368	325	387	352	412	345	308			318	407	311	353	324	367	336	382	343	345	309	322	309
0.1	339	351	308	343	349	379	338	397	361	424	358	314			329	416	320	363	330	382	346	394	352	348	317	327	314
0.11	348	361	316	351	357	390	339	408	370	436	365	322			335	428	335	371	339	390	356	401	360	358	323	334	320
0.12	357	368	326	358	360	402	345	417	381	446	374	327			345	438	337	380	346	400	367	413	372	366	327	341	329
0.13	367	380	326	371	378	414	359	427	393	458	382	335			354	451	348	391	353	411	376	423	375	374	339	338	334
0.14	375	389	335	379	387	420	360	436	399	469	391	342			363	456	357	401	363	420	386	437	385	383	345	354	339
0.15	389	399	341	388	396	430	369	446	408	481	403	347			373	466	364	410	368	432	399	442	392	395	352	358	351
0.16	393	402	348	396	405	439	375	455	416	491	409	354			379	476	375	417	381	443	403	450	398	398	358	366	356
0.17	403	418	351	405	413	450	382	469	425	500	418	365			389	484	386	426	382	446	415	460	405	404	366	371	363
0.18	412	428	359	416	424	463	387	473	435	514	427	366			396	495	388	434	391	457	423	467	413	413	372	378	369
0.19	419	438	366	420	429	467	395	481	440	519	435	372			405	506	396	443	396	463	431	473	420	418	379	387	376
0.2	432	446	371	430	439	478	401	489	449	529	445	378			414	509	405	451	403	472	441	486	425	425	386	386	384
0.21	435	453	378	438	447	485	408	497	457	535	449	383			420	517	412	459	410	476	452	492	432	435	391	395	386
0.22	444	463	374	446	454	493	414	508	466	546	457	391			428	524	420	466	416	487	456	498	438	436	397	398	394
0.23	453	472	390	456	458	498	422	511	474	559	464	393			438	533	431	474	422	493	463	504	446	445	401	404	399
0.24	460	479	396	461	469	508	424	520	479	561	470	399			442	540	432	486	427	500	473	512	448	448	410	409	406
0.25	459	488	400	468	476	515	433	526	486	569	471	404			450	552	439	486	435	506	477	520	456	454	412	418	411
0.26	474	496	405	474	483	523	436	533	492	577	483	409			455	553	446	496	440	511	485	523	461	456	419	418	420
0.27	483	508	411	482	490	530	441	542	498	584	491	413			464	561	452	502	449	517	495	531	466	465	422	422	421
0.28	490	509	421	479	491	538	448	543	502	594	496	417			469	566	449	507	452	526	498	537	471	467	427	427	425
0.29	497	519	419	495	501	551	456	551	511	597	501	423			481	572	464	514	456	530	504	542	479	473	432	431	431
0.3	503	524	426	500	508	549	456	557	518	604	508	427			480	572	469	526	463	535	508	548	479	479	440	431	436
0.4	562	586	462	550	557	605	500	606	566	652	555	466			534	630	514	573	508	578	560	595	519	520	476	472	479
0.5	610	633	504	590	593	646	531	648	604	700	593	497			577	671	554	616	547	614	594	633	554	544	510	505	514
0.6	650	670	530	623	628	684	565	676	643	732	625	524			611	701	587	652	578	642	625	660	580	573	537	526	543
0.7	677	700	557	648	652	715	590	703	671	759	652	543			636	726	612	679	606	664	651	682	602	598	559	550	566
0.8	706	724	578	669	672	739	611	722	696	781	672	563			660	747	630	703	627	681	669	704	620	615	578	569	588
0.9	724	743	596	680	691	754	631	739	709	802	689	578			681	764	646	722	648	697	685	717	636	629	594	586	603
1	740	758	610	701	701	777	643	753	734	815	703	593			696	779	661	740	661	709	699	730	651	645	607	597	617
1.1	754	775	628	708	710	788	655	769	743	825	714	599			707	791	672	754	672	719	708	745	660	649	621	611	632
1.2	763	784	636	718	721	800	666	771	756	835	725	616			719	795	682	761	689	729	715	751	670	664	633	623	640
1.3	776	792	646	726	727	808	676	787	765	843	727	620			725	808	687	773	698	737	723	758	677	674	640	630	649
1.4	780	799	653	732	733	816	682	792	773	850	738	628			733	815	694	783	709	740	729	765	683	679	648	637	656
1.5	786	805	661	739	739	823	691	797	776	858	743	634			739	815	700	794	715	745	731	769	688	684	655	643	661
1.6	792	812	669	740	741	824	694	802	786	861	745	640			743	827	703	797	719	751	737	774	696	692	661	649	668
1.7	793	809	672	746	740	825	693	806	787	858	749	647			745	830	709	803	722	752	741	778	697	696	665	654	675
1.8	794	818	677	746	746	829	703	806	790	867	753	647			750	835	711	808	728	755	742	784	700	698	671	658	677
1.9	800	817	678	749	749	830	705	813	794	869	749	654			755	835	713	812	732	757	743	783	705	703	675	664	682
2	802	820	682	749	750	831	707	814	795	871	755	653			756	835	715	813	737	759	746	787	706	708	679	667	680
2.1	804	821	684	753	754	833	711	817	793	867	755	657			754	838	714	816	737	760	747	791	709	708	682	668	685
2.2	799	822	689	753	752	831	709	820	799	877	756	660			755	840	715	820	738	760	748	791	711	711	686	674	688
2.3	799	824	689	758	757	832	716	822	798	874	756	664			750	839	718	821	742	762	748	792	713	716	689	675	692
2.4	805	828	693	757	756	831	713	818	799	876	760	662			755	839	717	822	744	763	749	793	715	717	691	678	692
2.5	806	826	692	760	759	830	716	825	801	878	758	669			845	839	717	826	743	763	752	794	716	719	695	683	697
2.6	810	827	695	760	759	829	718	825	801	881	757	668			755	840	717	827	744	763	753	796	718	725	696	684	699
2.7	806	827	696	762	764	832	718	829	799	881	759	669			755	841	719	829	747	765	755	797	720	727	702	688	699
2.8	810	829	698	766	763	828	721	829	801	885	760	671			756	840	720	829	746	766	755	798	719	728	703	687	700
2.9	807	830	694	764	768	830	721	832	802	884	761	676			758	840	719	831	747	765	757	802	724	729	705	691	704
3	808	832	703	769	766	831	724	834	803	887	764	676			759	842	721	834	747	769	759	797	729	734	709	690	704
4	816	845	722	789	792	840	734	855	814	910	779	696			764	852	733	848	760	786	775	821	752	766	737	717	724
5	836	866	749	819	820	860	756	882	837	938	802	722			778	867	754	872	778	809	798	839	780	795	760	742	747
6	855	894	775	847	850	887	774	910	864	965	826	748			797	888	780	892	802	830	821	860	805	826	785	764	769
7	879	919	801	870	872	909	792	934	889	984	849	768			813	904	800	910	822	846	839	878	825	862	801	781	785
8	898	941	825	891	894	927	812	955	912	1000	868	788			828	919	814	921	840	860	854	890	840	867	816	802	802
9	915	962	842	903	910	941	824	970	926	1014	884	802			838	930	829	934	856	870	866	899	857	883	826	816	815
10	931	984	860	926	927	953	836	988	946	1023	899	817			850	938	827	945	873	879	876	907	873	901	835	829	828
11	947	1002	877	943	945	965	848	1000	961	1037	914	834			857	947	854	958	887	924	887	916	887	920	847	842	843
12	963	1020	891	960	963	978	861	1019	975	1049	926	847			868	956	868	967	899	898	898	923	902	938	855	856	853
13	978	1037	910	977	979	994	875	1033	991	1061	944	864			878	950	881	978	914	906	911	929	916	956	869	870	869
14	994	1058	927	995	999	1006	888	1048	1004	1075	959	879			889	971	898	990	928	916	925	939	928	976	884	884	887
15	1009	1074	945	1010	1017	1020	897	1062	1019	1090	974	892			899	981	910	1004	942	928	938	952	946	995	895	899	900
16	1023	1091	964	1027	1034	1036	912	1078	1033	1105	988	908			910	988	925	1017	957	937	952	961	960	1017	908	914	916
17	1039	1104	978	1044	1049	1050	925	1091	1048	1120	1003	920			922	1000	940	1028	972	951	964	970	976	1035	918	931	934
18	1050	1122	996	1059	1067	1065	939	1105	1062	1135	1019	936			933	1011	952	1039	987	962	975	982	989	1050	933	945	949
19	1064	1134	1014	1073	1080	1080	953	1118	1075	1148	1032	951			945	1019	966	1051	1003	972	989	992	1002	1071	948	958	962
20	1079	1147	1030	1081	1092	1094	966	1132	1089	1162	1045	965			955	1028	978	1061	1014	983	1002	1002	1012	1084	957	973	975
21	1088	1160	1044	1096	1106	1105	978	1148	1101	1176	1057	976			964	1038	989	1071	1027	994	1013	1011	1027	1099	970	988	989
22	1099	1170	1058	1106	1113	1121	988	1159	1115	1189	1071	987			974	1049	1001	1081	1043	1003	1022	1021	1039	1116	981	1001	1000
23	1104	1179	1072	1116	1126	1134	1001	1173	1128	1199	1084	998			983	1057	1010	1093	1056	1012	1030	1030	1050	1129	991	1013	1014
24	1121	1186	1085	1127	1134	1145	1010	1185	1139	1210	1092	1009			992	1067	1019	1101	1069	1021	1040	1041	1062	1140	1002	1027	1024
25	1129	1193	1095	1133	1145	1155	1021	1195	1147	1223	1106	1017			999	1075	1028	1109	1078	1031	1048	1049	1073	1152	1014	1038	1033
26	1135	1201	1106	1142	1151	1167	1029	1204	1159	1230	1115	1024			1004	1082	1035	1117	1088	1038	1056	1056	1080	1164	1022	1050	1043
27	1143	1206	1117	1147	1157	1175	1039	1215	1171	1242	1123	1034			1015	1090	1045	1124	1100	1046	1064	1066	1094	1174	1031	1060	1051
28	1150	1210	1124	1152	1163	1186	1046	1224	1178	1249	1133	1043			1020	1096	1053	1133	1108	1054	1070	1073	1101	1181	1039	1070	1062
29	1154	1214	1129	1159	1169	1197	1054	1232	1188	1258	1138	1048			1026	1103	1058	1139	1119	1061	1078	1081	1110	1190	1048	1078	1066
30	1157	1218	1141	1162	1175	1206	1062	1239	1198	1266	1148	1057			1033	1113	1065	1145	1127	1067	1082	1088	1119	1196	1055	1088	1075
40	1195	1246	1197	1195	1211	1274	1115	1301	1264	1318	1204	1105			1080	1169	1111	1190	1189	1119	1123	1147	1179	1247	1114	1157	1131
50	1216	1262	1225	1214	1233	1316	1149	1335	1303	1348	1235	1137			1108	1206	1139	1218	1225	1152	1149	1187	1217	1273	1155	1197	1165
60	1234	1277	1245	1231	1251	1346	1173	1358	1326	1368	1258	1161			1132	1234	1159	1238	1249	1174	1172	1221	1244	1291	1186	1224	1190
70	1249	1292	1259	1248	1269	1367	1192	1374	1341	1383	1275	1180			1151	1254	1177	1256	1269	1191	1191	1247	1264	1306	1209	1243	1209
80	1264	1310	1270	1262	1284	1384	1209	1387	1351	1398	1291	1196			1166	1272	1192	1271	1282	1206	1211	1269	1283	1318	1232	1259	1224
90	1277	1326	1281	1278	1297	1401	1222	1398	1362	1410	1305	1210			1181	1288	1207	1286	1298	1219	1230	1288	1299	1330	1250	1273	1238
100	1288	1340	1289	1291	1312	1414	1236	1408	1368	1423	1318	1224			1196	1301	1221	1300	1310	1232	1244	1306	1316	1340	1268	1286	1250
110	1299	1353	1300	1305	1324	1427	1248	1419	1376	1434	1331	1237			1209	1313	1233	1314	1322	1243	1259	1322	1332	1351	1284	1298	1261
120	1307	1365	1309	1317	1337	1440	1260	1429	1384	1445	1342	1249			1221	1324	1243	1326	1336	1253	1270	1335	1346	1361	1297	1309	1270
130	1317	1375	1317	1326	1348	1450	1270	1439	1390	1455	1351	1260			1231	1334	1253	1336	1346	1263	1280	1346	1360	1370	1310	1320	1280
140	1324	1382	1325	1337	1355	1461	1278	1447	1398	1464	1360	1268			1240	1343	1262	1347	1357	1271	1291	1357	1372	1380	1320	1331	1287
150	1329	1387	1332	1345	1365	1469	1286	1454	1403	1473	1368	1277			1248	1351	1269	1355	1367	1278	1296	1364	1383	1387	1329	1341	1293
160	1336	1393	1338	1350	1372	1477	1294	1463	1411	1481	1375	1284			1255	1358	1274	1363	1375	1285	1301	1372	1393	1394	1336	1349	1299
170	1340	1396	1344	1357	1377	1483	1300	1468	1416	1487	1381	1289			1260	1364	1280	1370	1383	1290	1305	1377	1401	1399	1341	1358	1304
180	1343	1399	1348	1361	1381	1488	1305	1475	1422	1493	1385	1294			1265	1370	1282	1374	1389	1295	1308	1382	1408	1406	1347	1364	1310
190	1346	1400	1353	1366	1385	1494	1309	1479	1429	1498	1390	1298			1269	1374	1286	1379	1394	1297	1319	1386	1413	1409	1350	1370	1311
200	1350	1401	1357	1368	1389	1496	1313	1484	1432	1502	1392	1302			1271	1378	1287	1382	1398	1302	1311	1388	1417	1414	1354	1374	1313
210	1352	1403	1360	1370	1390	1500	1316	1487	1437	1505	1394	1305			1274	1382	1289	1384	1402	1304	1314	1391	1420	1418	1355	1379	1316
220	1353	1403	1364	1372	1392	1503	1317	1490	1440	1506	1397	1306			1275	1384	1290	1387	1407	1306	1314	1392	1423	1419	1357	1383	1318
230	1354	1403	1365	1371	1393	1504	1320	1492	1444	1509	1397	1308			1276	1387	1291	1388	1407	1307	1314	1394	1425	1423	1358	1385	1314
240	1354	1404	1368	1373	1392	1506	1320	1494	1447	1510	1399	1309			1277	1389	1292	1390	1410	1308	1315	1395	1427	1424	1359	1388	1321
250	1355	1403	1368	1374	1394	1507	1322	1495	1448	1511	1399	1311			1276	1390	1292	1390	1411	1309	1314	1395	1427	1425	1360	1389	1321
260	1357	1404	1370	1373	1393	1507	1323	1496	1451	1512	1400	1311			1278	1391	1290	1391	1412	1309	1315	1397	1428	1426	1360	1390	1323
270	1355	1403	1371	1373	1393	1507	1322	1496	1453	1512	1399	1311			1277	1391	1292	1392	1413	1310	1314	1397	1428	1426	1359	1392	1322
280	1356	1404	1372	1373	1393	1507	1324	1497	1454	1513	1400	1312			1277	1394	1291	1391	1413	1311	1314	1396	1429	1428	1361	1392	1322
290	1356	1404	1373	1374	1393	1508	1323	1497	1456	1513	1400	1312			1277	1393	1290	1392	1413	1310	1315	1397	1428	1428	1360	1392	1323
300	1356	1404	1372	1374	1394	1507	1323	1497	1456	1513	1400	1312			1277	1394	1291	1391	1413	1311	1315	1397	1428	1426	1360	1396	1323
400	1355	1404	1373	1373	1393	1506	1323	1497	1456	1511	1398	1312			1276	1395	1290	1390	1411	1311	1314	1398	1427	1428	1359	1391	1323
500	1355	1403	1371	1371	1392	1504	1322	1495	1454	1509	1397	1311			1274	1394	1287	1388	1409	1309	1313	1397	1425	1425	1357	1391	1321
600	1353	1403	1370	1372	1391	1503	1320	1494	1453	1507	1395	1310			1274	1393	1287	1387	1408	1308	1311	1395	1423	1423	1355	1388	1320
700	1352	1401	1368	1370	1389	1500	1318	1492	1451	1505	1393	1308			1272	1391	1284	1386	1406	1307	1309	1394	1421	1420	1356	1389	1317
800	1351	1399	1366	1369	1389	1499	1315	1490	1450	1503	1391	1304			1270	1388	1282	1384	1405	1306	1307	1391	1419	1417	1355	1386	1316
900	1349	1398	1364	1367	1386	1496	1313	1489	1447	1500	1389	1303			1268	1387	1280	1383	1403	1304	1305	1390	1418	1414	1354	1385	1314
1000	1348	1395	1362	1366	1384	1493	1311	1488	1445	1497	1387	1300			1266	1385	1278	1380	1401	1302	1302	1389	1416	1411	1351	1393	1312
1100	1346	1394	1360	1364	1382	1491	1309	1486	1443	1494	1384	1298			1265	1383	1276	1379	1398	1301	1301	1386	1414	1410	1350	1381	1309
1200	1344	1391	1359	1362	1380	1488	1307	1483	1440	1492	1383	1297			1263	1380	1273	1377	1396	1300	1298	1384	1412	1408	1348	1378	1309
1300	1343	1389	1357	1359	1377	1486	1306	1482	1438	1489	1379	1295			1261	1379	1271	1376	1394	1298	1297	1381	1409	1405	1346	1374	1307
1400	1341	1386	1356	1356	1375	1484	1303	1479	1435	1485	1386	1293			1260	1377	1269	1374	1391	1296	1295	1381	1406	1404	1332	1372	1305
1500	1339	1385	1354	1355	1372	1482	1302	1478	1433	1483	1386	1292			1258	1375	1267	1372	1387	1295	1293	1378	1403	1403	1340	1370	1303
1600	1336	1383	1354	1353	1370	1480	1300	1476	1432	1481	1373	1290			1256	1374	1264	1370	1385	1293	1292	1377	1402	1401	1340	1367	1301
1700	1335	1381	1352	1352	1369	1478	1300	1473	1429	1478	1371	1288			1254	1372	1263	1369	1382	1292	1290	1375	1398	1398	1337	1365	1299
1800	1333	1378	1351	1349	1367	1475	1299	1472	1428	1475	1369	1287			1253	1370	1261	1367	1379	1289	1289	1374	1395	1395	1335	1361	1297
1900	1331	1378	1349	1347	1365	1473	1296	1470	1426	1473	1367	1285			1251	1368	1259	1364	1377	1289	1287	1373	1393	1394	1334	1359	1294
2000	1329	1376	1348	1346	1363	1471	1295	1469	1426	1471	1366	1283			1252	1366	1258	1363	1375	1287	1286	1371	1391	1392	1331	1357	1294

## Sheet: 7 DIAS-1
	Retusin 50 uM														Retusin 100 uM
Time	File 1	File 2	File 3	File 4	File 5	File 6	File 7	File 8	File 9	File 10	File 11	File 12			File 1	File 2	File 3	File 4	File 5	File 6	File 7	File 8	File 9	File 10	File 11	File 12
0.01	338	283	282	285	285	260	285	318	264	237	277	248			297	255	340	297	302	262	379	291	254	399	251	415
0.02	336	291	289	291	291	266	296	325	269	245	286	252			305	258	353	308	306	268	386	301	260	405	252	421
0.03	347	298	297	299	299	269	304	341	277	255	289	261			314	269	366	315	320	271	398	304	268	414	245	433
0.04	357	305	305	311	311	275	314	345	286	262	299	270			323	274	384	325	324	287	411	314	278	428	277	444
0.05	366	314	314	318	318	285	325	359	287	272	308	281			334	283	401	338	334	294	423	322	290	438	288	460
0.06	374	323	328	330	330	293	335	369	304	280	317	292			344	291	419	347	347	305	440	490	296	450	291	469
0.07	387	332	333	340	340	300	346	381	312	295	318	299			354	301	430	362	355	315	450	329	308	461	302	482
0.08	398	339	342	349	349	315	355	393	322	301	337	310			364	305	454	371	366	325	464	350	315	473	312	495
0.09	408	348	352	363	363	317	369	410	332	318	347	322			380	318	470	383	380	334	478	362	327	483	323	507
0.1	417	357	360	376	376	327	379	417	340	311	356	330			384	328	487	395	387	349	490	370	334	494	331	519
0.11	428	364	369	381	381	335	390	426	349	326	368	345			394	336	503	405	399	357	501	381	348	505	344	535
0.12	435	373	382	393	393	344	402	439	361	341	378	353			407	345	517	415	408	369	516	391	352	516	350	543
0.13	447	386	386	402	402	353	416	449	371	353	384	364			415	353	526	429	417	378	526	393	362	528	360	556
0.14	457	387	396	414	414	367	423	460	380	357	396	374			426	366	544	435	427	390	537	410	371	535	368	567
0.15	465	398	404	420	420	370	432	474	388	366	406	384			440	371	558	445	440	402	547	417	378	545	376	580
0.16	473	405	412	434	434	378	444	478	398	374	417	385			443	379	569	453	446	408	560	427	386	555	384	591
0.17	483	413	417	441	441	387	453	490	411	383	425	404			454	388	580	463	456	420	567	436	394	562	397	604
0.18	491	420	429	449	449	395	462	496	413	386	435	415			460	396	593	470	464	426	578	443	403	571	400	608
0.19	497	431	435	458	458	400	477	506	423	399	445	422			470	404	597	483	473	435	586	444	410	580	408	621
0.2	506	436	441	466	466	411	480	505	431	404	451	433			479	414	613	484	478	444	594	461	416	589	414	629
0.21	513	440	449	477	477	418	490	524	439	411	460	440			492	418	622	492	488	457	600	468	424	595	423	640
0.22	520	449	455	482	482	425	499	531	445	419	468	448			494	426	630	500	496	460	610	475	429	603	428	648
0.23	527	454	460	489	489	432	507	537	459	423	476	457			499	432	637	503	504	467	618	482	436	610	438	661
0.24	537	452	468	496	496	441	507	546	459	432	485	463			509	441	645	507	512	475	625	490	442	616	440	664
0.25	539	467	475	502	502	443	523	551	467	434	496	472			514	446	655	517	517	481	631	486	447	624	447	672
0.26	547	472	480	509	509	452	533	558	474	441	498	479			522	456	659	524	528	488	638	503	452	634	452	682
0.27	554	479	486	518	518	459	537	562	479	446	506	486			528	458	666	528	530	501	643	508	457	634	458	688
0.28	558	483	493	520	520	464	546	571	487	450	513	494			534	465	672	532	537	501	649	514	467	643	464	696
0.29	565	490	500	527	527	471	552	578	497	457	519	497			541	470	676	539	543	508	657	521	467	647	470	707
0.3	575	496	501	532	532	476	560	583	496	464	525	505			546	475	684	535	549	513	660	527	473	651	473	708
0.4	617	539	543	574	574	524	611	632	541	499	580	552			597	520	722	583	599	563	701	574	513	696	514	763
0.5	654	577	575	608	608	563	654	664	582	528	624	587			635	556	747	612	632	597	729	609	542	731	547	804
0.6	685	600	601	635	635	592	681	697	612	551	654	614			665	581	765	636	664	625	750	639	562	757	571	835
0.7	709	627	623	655	655	617	704	721	633	564	681	631			690	636	780	653	690	645	767	661	583	779	593	858
0.8	728	649	640	670	670	631	724	741	651	581	698	647			710	617	787	672	707	664	781	679	601	794	608	876
0.9	747	665	656	683	683	650	738	756	667	588	717	661			726	630	794	682	724	677	792	695	610	810	624	890
1	758	677	664	689	689	664	748	768	672	597	731	663			736	642	798	692	734	685	798	707	622	816	633	903
1.1	771	689	675	701	701	671	758	779	686	599	745	676			750	647	805	696	747	699	806	718	631	829	643	914
1.2	782	698	683	709	709	683	767	786	696	609	750	681			759	655	806	707	753	708	809	725	634	838	651	923
1.3	788	705	684	711	711	691	772	795	701	612	761	686			767	663	808	713	761	710	815	732	644	842	656	929
1.4	794	711	695	718	718	692	778	799	707	613	761	689			698	663	812	720	763	717	821	739	648	850	663	939
1.5	800	718	703	723	723	700	782	801	713	619	768	692			779	670	811	717	768	721	821	743	654	854	662	941
1.6	803	720	704	726	726	704	785	807	709	621	775	695			785	670	812	723	773	727	824	746	655	857	667	945
1.7	806	726	708	726	726	707	787	806	716	622	778	698			786	674	807	726	772	726	821	751	657	860	670	951
1.8	812	729	714	730	730	710	790	810	720	624	780	693			791	676	812	731	776	730	826	752	660	864	670	953
1.9	811	730	715	722	722	711	791	810	721	626	784	699			789	680	814	734	770	732	828	757	661	865	672	953
2	811	732	716	730	730	711	793	808	722	625	782	700			794	679	811	730	774	730	824	752	664	866	674	954
2.1	814	735	720	733	733	714	793	813	724	628	788	699			798	682	812	735	773	731	831	759	667	868	674	959
2.2	814	735	723	735	735	716	795	815	821	629	789	702			798	685	809	739	775	730	831	761	666	870	676	957
2.3	815	736	722	733	733	712	796	816	727	630	786	702			801	684	811	741	773	731	831	757	668	869	679	963
2.4	815	740	725	736	736	717	793	815	727	633	789	703			797	687	812	744	771	733	833	762	667	871	677	960
2.5	816	738	726	739	739	717	797	819	726	634	791	703			804	683	806	746	772	730	834	761	669	871	681	961
2.6	816	741	726	739	739	720	799	817	729	638	792	703			804	688	812	749	772	730	836	764	668	871	679	963
2.7	813	739	729	737	737	717	801	819	730	636	790	705			807	692	813	750	774	734	837	767	671	873	681	963
2.8	818	741	732	741	741	719	798	822	731	638	792	706			810	689	811	753	771	730	839	770	673	868	680	961
2.9	818	742	731	738	738	721	800	819	732	641	796	706			811	691	814	756	773	730	836	767	669	872	683	962
3	821	744	734	741	741	717	800	823	734	644	792	709			815	697	814	757	773	729	841	770	675	876	684	963
4	829	757	748	756	756	729	809	840	745	662	800	719			837	712	825	785	779	736	858	788	692	884	700	966
5	846	777	765	775	775	744	824	867	764	687	815	736			865	734	840	811	796	752	877	810	715	899	723	974
6	866	797	783	793	793	764	842	891	782	705	832	749			889	754	856	834	814	766	895	829	732	917	744	984
7	884	814	794	806	806	778	855	912	796	717	848	763			910	769	866	846	833	785	907	847	745	930	759	994
8	897	829	805	819	819	795	871	927	809	727	862	779			926	781	873	858	845	798	916	861	758	942	776	1006
9	909	841	811	826	826	806	882	940	819	733	874	791			939	790	883	865	858	811	921	873	768	952	787	1017
10	920	852	820	834	834	819	892	950	832	744	885	800			951	803	889	873	867	820	929	884	777	960	797	1027
11	929	862	827	843	843	831	902	961	843	755	894	813			965	812	898	884	876	829	936	893	786	969	807	1037
12	940	873	833	850	850	841	913	970	854	764	903	825			980	822	909	895	888	839	941	908	796	975	816	1047
13	950	883	842	857	857	850	922	983	863	775	912	837			994	835	911	905	896	848	949	917	805	983	827	1055
14	960	895	849	870	870	864	932	994	875	789	921	849			1006	847	916	917	908	857	958	930	815	992	837	1062
15	970	906	859	877	877	874	942	1006	887	800	931	859			1021	860	925	928	919	867	965	942	825	1000	850	1070
16	981	935	868	889	889	885	950	1019	897	812	936	868			1037	870	931	939	929	878	972	954	839	1009	862	1078
17	993	931	879	898	898	896	960	1030	907	825	948	878			1047	879	936	948	940	889	980	965	849	1017	875	1082
18	1004	943	886	908	908	907	969	1043	918	836	956	888			1062	890	943	963	951	897	987	976	860	1028	884	1091
19	1013	954	896	915	915	916	975	1055	928	844	967	895			1075	899	951	973	960	905	993	985	872	1035	896	1095
20	1024	965	906	925	925	927	981	1065	935	856	975	901			1087	907	955	985	972	915	999	997	879	1044	907	1101
21	1033	973	913	934	934	933	992	1076	945	864	986	908			1098	914	961	992	977	922	1006	1008	890	1052	916	1108
22	1043	982	921	943	943	941	998	1086	950	873	995	914			1107	923	964	1005	989	931	1012	1013	900	1059	925	1112
23	1053	993	930	949	949	949	1003	1095	959	879	1002	919			1117	930	971	1013	997	938	1014	1023	908	1067	933	1118
24	1058	997	936	957	957	955	1009	1105	963	888	1010	924			1129	934	975	1024	1003	944	1021	1029	917	1074	941	1121
25	1067	1006	943	964	964	964	1015	1113	971	891	1019	928			1137	940	978	1031	1009	949	1025	1037	926	1079	947	1126
26	1076	1016	950	970	970	966	1016	1120	975	900	1025	933			1145	947	980	1040	1017	956	1029	1045	933	1089	955	1130
27	1083	1022	953	979	979	973	1024	1128	981	906	1034	935			1151	948	985	1046	1023	961	1035	1051	939	1093	961	1135
28	1091	1028	962	985	985	979	1026	1135	985	910	1041	938			1158	955	988	1054	1029	966	1039	1057	946	1099	968	1137
29	1096	1033	966	991	991	982	1032	1139	989	915	1048	941			1165	960	991	1058	1035	969	1041	1064	953	1105	975	1139
30	1103	1037	971	996	996	988	1032	1146	993	920	1053	945			1173	959	992	1066	1041	975	1043	1067	957	1112	976	1142
40	1150	1082	1017	1039	1039	1017	1057	1188	1022	951	1104	965			1210	992	1014	1111	1078	1005	1072	1107	1002	1156	1012	1162
50	1182	1109	1056	1067	1067	1037	1074	1214	1042	975	1137	982			1238	1013	1029	1139	1100	1025	1096	1133	1030	1185	1032	1176
60	1208	1127	1078	1087	1087	1058	1090	1232	1062	993	1160	1001			1264	1033	1044	1158	1117	1043	1116	1157	1051	1207	1051	1192
70	1226	1145	1099	1106	1106	1072	1105	1247	1080	1015	1174	1021			1280	1051	1055	1177	1133	1060	1137	1178	1065	1225	1064	1201
80	1244	1158	1119	1119	1119	1090	1119	1261	1097	1033	1188	1041			1298	1067	1068	1193	1148	1079	1159	1198	1078	1239	1082	1215
90	1260	1172	1135	1131	1131	1103	1133	1273	1113	1049	1198	1057			1315	1083	1078	1206	1161	1095	1178	1219	1091	1255	1095	1227
100	1273	1183	1161	1142	1142	1115	1144	1284	1124	1062	1207	1073			1330	1095	1088	1222	1176	1112	1194	1234	1103	1267	1108	1237
110	1287	1195	1162	1152	1152	1125	1155	1296	1136	1075	1206	1083			1349	1106	1097	1234	1188	1125	1209	1252	1113	1280	1120	1250
120	1296	1206	1174	1162	1162	1133	1164	1307	1146	1084	1222	1094			1352	1115	1104	1245	1199	1144	1221	1266	1120	1290	1129	1256
130	1307	1215	1181	1169	1169	1141	1171	1319	1151	1089	1229	1101			1360	1122	1109	1256	1210	1151	1233	1274	1127	1298	1140	1268
140	1314	1223	1191	1177	1177	1147	1175	1328	1160	1095	1235	1105			1367	1128	1114	1266	1219	1160	1240	1284	1135	1310	1148	1274
150	1323	1230	1207	1183	1183	1152	1181	1336	1163	1097	1240	1108			1375	1134	1119	1272	1228	1166	1249	1293	1142	1316	1155	1282
160	1329	1236	1203	1189	1189	1157	1185	1345	1167	1099	1245	1110			1387	1135	1122	1280	1233	1174	1253	1299	1147	1324	1160	1290
170	1333	1242	1208	1194	1194	1160	1188	1350	1172	1101	1250	1111			1381	1139	1126	1285	1239	1180	1257	1304	1150	1330	1163	1294
180	1337	1245	1211	1198	1198	1163	1192	1356	1174	1102	1253	1112			1384	1141	1128	1289	1243	1183	1259	1307	1155	1334	1169	1301
190	1340	1249	1214	1202	1202	1166	1193	1360	1176	1103	1258	1113			1388	1142	1128	1291	1246	1185	1261	1310	1157	1341	1171	1304
200	1342	1252	1221	1204	1204	1166	1193	1362	1177	1102	1259	1113			1388	1145	1131	1278	1249	1187	1264	1310	1161	1344	1172	1308
210	1344	1254	1218	1208	1208	1169	1195	1366	1179	1103	1265	1112			1390	1145	1132	1294	1249	1190	1264	1312	1163	1346	1174	1313
220	1346	1256	1218	1210	1210	1169	1194	1368	1180	1102	1267	1114			1390	1145	1132	1295	1251	1190	1265	1314	1164	1351	1175	1314
230	1348	1257	1220	1211	1211	1170	1194	1369	1180	1103	1268	1114			1391	1146	1133	1295	1253	1192	1265	1314	1164	1353	1176	1317
240	1349	1258	1221	1212	1212	1171	1196	1371	1181	1102	1269	1114			1391	1146	1134	1295	1253	1191	1265	1314	1166	1355	1176	1317
250	1349	1259	1225	1213	1213	1171	1197	1372	1181	1103	1273	1113			1392	1144	1133	1297	1254	1192	1267	1314	1166	1356	1177	1319
260	1350	1260	1221	1214	1214	1172	1197	1373	1181	1103	1274	1113			1392	1146	1135	1295	1255	1193	1265	1316	1167	1357	1177	1322
270	1349	1259	1222	1215	1215	1172	1197	1372	1181	1104	1275	1115			1392	1146	1132	1295	1254	1193	1265	1314	1166	1358	1175	1320
280	1351	1259	1222	1214	1214	1172	1197	1375	1181	1103	1276	1112			1392	1146	1133	1296	1254	1193	1265	1316	1166	1358	1179	1323
290	1351	1259	1222	1215	1215	1173	1197	1373	1181	1103	1277	1114			1391	1145	1134	1295	1255	1194	1266	1316	1168	1359	1177	1322
300	1351	1261	1223	1215	1215	1173	1197	1374	1181	1103	1278	1114			1392	1145	1132	1299	1255	1192	1266	1315	1167	1360	1176	1323
400	1350	1255	1222	1214	1214	1172	1196	1372	1181	1103	1280	1116			1391	1143	1133	1299	1254	1193	1266	1317	1167	1359	1177	1324
500	1349	1254	1221	1214	1214	1170	1195	1371	1181	1102	1280	1116			1388	1141	1132	1296	1253	1192	1264	1316	1166	1358	1163	1325
600	1347	1251	1230	1212	1212	1169	1193	1370	1178	1102	1278	1114			1386	1142	1131	1294	1251	1191	1263	1323	1163	1356	1173	1322
700	1346	1250	1220	1210	1210	1167	1193	1367	1177	1100	1277	1111			1384	1140	1130	1295	1249	1188	1261	1312	1162	1353	1170	1322
800	1344	1248	1220	1209	1209	1165	1192	1365	1175	1099	1275	1112			1383	1139	1129	1294	1246	1188	1260	1311	1162	1354	1171	1321
900	1343	1246	1215	1208	1208	1164	1190	1363	1173	1098	1273	1110			1380	1134	1128	1293	1246	1185	1257	1313	1159	1352	1170	1319
1000	1338	1244	1215	1206	1206	1162	1189	1360	1172	1095	1273	1109			1377	1134	1126	1293	1244	1184	1256	1306	1158	1349	1167	1318
1100	1338	1243	1213	1205	1205	1160	1187	1358	1171	1094	1272	1107			1376	1133	1126	1278	1242	1183	1254	1304	1157	1348	1166	1314
1200	1337	1241	1211	1203	1203	1160	1186	1357	1168	1091	1270	1105			1373	1131	1124	1287	1239	1181	1253	1301	1156	1345	1166	1314
1300	1335	1239	1210	1200	1200	1156	1186	1355	1167	1089	1268	1103			1371	1130	1123	1288	1238	1178	1251	1300	1155	1344	1164	1313
1400	1333	1236	1209	1201	1201	1156	1183	1353	1166	1089	1268	1102			1369	1128	1121	1286	1236	1178	1248	1298	1153	1343	1160	1310
1500	1330	1235	1208	1198	1198	1154	1183	1351	1163	1087	1266	1100			1368	1126	1119	1281	1235	1177	1247	1295	1152	1340	1159	1308
1600	1330	1232	1205	1198	1198	1153	1181	1348	1162	1085	1265	1099			1363	1126	1118	1280	1231	1176	1246	1294	1148	1338	1158	1309
1700	1328	1237	1204	1197	1197	1151	1179	1336	1162	1083	1264	1096			1361	1123	1117	1280	1230	1172	1243	1293	1150	1338	1157	1308
1800	1326	1231	1202	1194	1194	1148	1177	1345	1160	1081	1262	1095			1361	1123	1115	1277	1229	1172	1242	1291	1146	1337	1154	1305
1900	1323	1229	1201	1194	1194	1147	1176	1345	1158	1081	1260	1092			1358	1122	1113	1275	1227	1169	1240	1289	1143	1335	1153	1305
2000	1323	1227	1200	1190	1190	1147	1174	1338	1156	1078	1260	1092			1358	1120	1112	1274	1226	1169	1238	1287	1143	1334	1150	1302

## Sheet: 7 Dias-2
	Retusin 200 uM													Retusin 300 uM
Time	File 1	File 2	File 3	File 4	File 5	File 6	File 7	File 8	File 9	File 10	File 11			File 1	File 2	File 3	File 4	File 5	File 6	File 7	File 8	File 9	File 10
0.01	247	259	274	251	256	260	267	320	285	311	257			268	358	299	236	225	271	255	262	296	287
0.02	250	265	278	256	261	265	267	322	290	316	259			270	362	301	236	227	274	259	264	302	291
0.03	256	274	283	262	271	269	279	334	295	327	265			278	369	310	244	228	281	267	270	315	297
0.04	262	281	293	271	273	285	287	346	305	341	272			286	375	318	251	239	288	275	274	319	306
0.05	274	289	300	277	281	295	296	357	312	347	279			296	388	324	262	245	296	281	280	330	308
0.06	277	298	308	291	289	304	306	368	322	362	279			306	397	333	268	251	306	290	288	339	323
0.07	287	309	318	296	298	315	314	383	331	373	294			318	407	341	283	258	313	299	298	349	331
0.08	294	314	324	308	305	327	320	394	340	386	302			322	416	350	290	265	322	308	299	359	341
0.09	304	324	335	317	316	340	334	407	350	398	309			333	425	359	300	267	331	316	309	371	349
0.1	308	333	341	325	320	348	343	419	358	413	317			341	430	368	308	279	339	327	314	379	357
0.11	321	342	350	332	330	360	353	432	367	423	324			353	442	379	318	285	345	332	322	389	364
0.12	329	350	357	344	336	372	362	437	375	435	330			360	451	383	326	292	357	341	328	399	375
0.13	335	361	364	351	344	382	373	456	385	447	343			373	458	393	338	299	364	349	334	409	383
0.14	345	366	374	359	352	392	379	466	392	458	350			380	467	401	347	306	373	359	340	418	393
0.15	353	377	379	367	360	404	391	476	397	471	357			390	475	408	356	303	380	367	347	430	399
0.16	359	384	385	373	366	414	401	487	410	484	364			398	483	416	365	320	387	366	355	434	408
0.17	371	393	393	373	373	424	410	497	418	491	372			408	491	418	374	327	395	384	359	443	408
0.18	376	400	400	390	380	433	418	499	426	502	377			416	499	432	378	333	404	389	366	451	424
0.19	384	411	406	395	385	443	427	515	431	510	388			428	505	438	392	339	408	397	372	459	282
0.2	389	414	413	403	393	451	430	525	440	522	395			431	512	446	397	344	414	404	378	468	438
0.21	398	422	424	407	404	461	443	534	444	531	402			438	520	452	407	351	421	411	384	475	451
0.22	404	428	424	415	404	468	451	540	453	542	410			444	522	459	414	356	429	418	389	480	453
0.23	415	436	430	411	411	476	459	549	459	548	416			452	532	465	422	362	434	424	394	488	452
0.24	419	443	435	427	415	485	467	547	466	557	418			460	540	472	426	368	442	430	399	495	465
0.25	426	450	441	432	421	493	475	565	472	564	430			470	546	479	437	374	446	437	398	499	472
0.26	432	454	447	437	425	500	479	572	477	571	436			473	550	484	443	379	451	442	410	507	477
0.27	437	460	449	442	435	510	488	580	488	581	442			480	556	490	449	384	455	447	414	511	484
0.28	445	466	456	446	436	512	495	584	486	589	448			487	559	496	456	388	462	455	419	518	490
0.29	449	472	462	451	441	520	502	591	493	595	455			491	567	503	462	394	468	459	424	525	496
0.3	456	478	466	459	445	527	508	593	498	602	458			494	575	505	468	397	475	465	429	529	504
0.4	500	523	501	494	480	580	564	647	537	655	510			546	615	553	520	437	513	507	466	574	547
0.5	541	554	533	524	515	624	601	683	573	696	546			584	651	591	556	469	542	545	499	609	587
0.6	575	589	558	550	541	657	634	712	600	726	584			616	676	623	592	496	574	573	524	638	615
0.7	598	613	580	566	558	684	660	735	624	751	613			643	699	648	617	513	596	599	544	659	641
0.8	620	635	596	587	580	705	680	755	643	770	632			665	718	668	640	534	616	619	566	678	660
0.9	639	649	613	597	594	724	698	769	659	787	651			681	729	686	654	550	628	637	582	691	679
1	652	666	622	608	609	739	712	783	670	796	670			697	742	701	670	562	645	650	597	705	694
1.1	664	673	634	619	616	749	724	789	680	810	682			705	752	716	678	573	651	661	608	716	702
1.2	675	683	639	627	626	757	732	798	689	815	694			716	759	724	688	580	662	670	613	722	715
1.3	683	691	648	635	632	765	738	802	696	820	702			723	767	735	695	590	670	678	625	731	721
1.4	690	698	656	639	639	771	747	809	702	826	710			729	770	737	700	595	676	683	635	734	730
1.5	697	703	661	645	642	776	751	813	708	827	718			736	775	746	705	600	681	690	639	740	736
1.6	699	709	667	647	647	779	756	817	712	830	720			736	773	750	706	603	683	696	644	744	742
1.7	705	711	671	654	651	784	760	819	717	831	727			741	780	755	709	609	689	699	650	747	744
1.8	704	715	673	657	657	781	763	823	721	831	730			741	783	759	709	610	691	701	653	749	746
1.9	709	714	678	662	657	783	763	821	722	828	733			744	783	764	710	615	694	706	658	751	750
2	710	717	681	663	661	780	766	823	724	829	736			745	786	764	712	613	698	706	660	753	752
2.1	711	717	686	665	661	783	763	824	728	830	734			747	781	767	713	615	694	709	662	754	755
2.2	711	721	685	667	662	784	767	826	730	831	738			748	787	767	712	618	700	711	666	756	756
2.3	711	721	691	670	665	784	765	826	732	828	740			751	788	768	713	618	700	711	667	757	758
2.4	711	775	689	673	666	784	769	825	733	830	742			749	790	770	710	619	703	714	668	759	756
2.5	713	721	691	671	670	785	767	826	737	824	741			751	789	772	710	620	705	713	670	754	760
2.6	712	724	686	675	672	777	771	828	736	825	746			833	790	775	710	622	710	716	673	760	761
2.7	713	724	694	671	672	782	768	830	741	823	742			752	791	774	710	617	708	717	671	758	762
2.8	714	725	695	678	676	778	771	830	738	824	745			754	792	778	712	624	711	719	676	761	765
2.9	715	722	699	680	675	781	769	832	744	824	744			755	794	775	709	625	712	723	680	761	765
3	714	727	698	684	678	782	769	830	745	825	745			756	793	780	710	628	714	722	679	763	765
4	718	738	714	701	696	792	774	843	768	824	757			773	803	796	717	643	735	744	698	777	782
5	735	757	732	720	720	809	789	862	794	837	771			797	822	819	735	664	754	769	722	800	800
6	751	774	753	741	737	831	806	880	814	858	790			821	840	860	753	683	779	792	743	819	822
7	767	791	769	754	756	855	821	896	830	871	813			841	853	859	773	698	797	809	760	837	839
8	784	809	782	767	767	873	835	909	842	887	830			855	865	873	787	715	813	828	776	852	856
9	798	821	791	775	777	885	848	919	853	897	845			871	872	889	800	725	825	842	789	864	867
10	809	834	796	782	789	903	858	929	865	909	860			883	883	901	812	738	868	855	803	875	879
11	821	848	807	790	797	917	869	937	876	917	874			893	890	911	821	750	852	868	813	885	891
12	834	857	814	799	811	930	879	946	887	928	886			909	899	926	834	759	864	884	826	896	902
13	846	873	823	806	823	944	891	955	899	936	899			922	906	938	845	774	878	897	842	907	916
14	858	882	830	817	835	958	900	966	913	947	912			937	915	950	855	786	891	914	857	917	928
15	870	895	841	826	846	972	914	975	927	955	921			949	923	961	868	799	907	927	872	928	941
16	882	911	849	836	862	986	926	988	943	967	937			967	935	976	879	814	920	942	886	940	954
17	895	923	859	848	874	999	938	995	956	977	948			980	944	988	889	824	934	958	901	951	969
18	906	935	869	857	888	1013	948	1007	967	986	908			994	951	998	901	838	947	970	915	964	981
19	918	950	877	868	899	1025	959	1017	978	996	969			1010	960	1012	911	851	959	984	929	973	992
20	929	963	886	879	912	1036	968	1028	992	1006	980			1019	969	1023	919	861	970	996	943	983	1006
21	938	973	898	890	922	1047	980	1039	1003	1013	990			1032	976	1032	929	872	983	1007	955	994	1017
22	949	984	907	897	933	1057	990	1047	1017	1021	999			1045	981	1041	937	882	992	1019	970	1002	1028
23	957	994	913	905	942	1063	1000	1056	1024	1029	1008			1054	990	1052	945	892	1003	1027	981	1012	1040
24	965	1005	925	915	951	1074	1009	1064	1034	1034	1016			1061	996	1061	952	901	1011	1037	992	1020	1048
25	974	1012	934	923	959	1081	1015	1074	1043	1040	1022			1070	1005	1071	957	908	1021	1045	1004	1031	1059
26	983	1021	942	934	967	1089	1024	1081	1050	1047	1030			1079	1010	1078	962	914	1027	1053	1015	1035	1069
27	989	1029	950	940	976	1097	1030	1087	1060	1053	1033			1086	1016	1085	970	924	1035	1061	1025	1043	1076
28	992	1035	957	947	983	1103	1039	1096	1066	1057	1040			1093	1020	1090	972	933	1044	1068	1034	1051	1085
29	1002	1044	965	955	990	1108	1046	1101	1071	1062	1044			1097	1026	1098	979	936	1052	1074	1042	1057	1095
30	1006	1050	973	959	992	1112	1051	1060	1081	1068	1051			1105	1032	1104	984	945	1058	1081	1052	1066	1101
40	1048	1094	1029	1012	1037	1148	1100	1155	1129	1104	1088			1147	1075	1150	1013	992	1103	1130	1119	1110	1154
50	1074	1125	1067	1045	1066	1171	1131	1183	1164	1126	1119			1173	1107	1182	1032	1023	1131	1161	1162	1142	1191
60	1092	1149	1098	1067	1089	1194	1158	1209	1191	1149	1145			1193	1130	1206	1049	1047	1160	1187	1192	1163	1216
70	1109	1167	1119	1089	1109	1214	1177	1228	1215	1171	1166			1211	1154	1225	1067	1071	1168	1210	1214	1182	1235
80	1123	1182	1139	1105	1123	1233	1194	1234	1236	1189	1190			1228	1174	1245	1083	1091	1182	1230	1231	1197	1254
90	1137	1199	1156	1124	1139	1253	1208	1259	1255	1205	1210			1247	1190	1259	1099	1111	1194	1251	1248	1210	1270
100	1148	1212	1170	1138	1155	1270	1219	1270	1270	1220	1227			1261	1206	1277	1115	1129	1209	1269	1265	1222	1283
110	1161	1226	1185	1153	1166	1286	1230	1282	1288	1229	1241			1273	1220	1290	1127	1143	1220	1287	1276	1233	1297
120	1171	1236	1194	1167	1176	1299	1238	1293	1301	1240	1253			1286	1234	1303	1140	1157	1229	1302	1291	1242	1310
130	1180	1244	1208	1176	1185	1313	1247	1303	1313	1249	1262			1293	1244	1314	1145	1169	1239	1314	1301	1251	1321
140	1187	1253	1218	1186	1194	1321	1256	1313	1321	1257	1269			1302	1251	1322	1155	1179	1249	1323	1313	1260	1328
150	1195	1261	1228	1195	1201	1327	1262	1319	1329	1262	1276			1308	1256	1329	1161	1188	1257	1332	1325	1265	1339
160	1201	1266	1236	1201	1206	1334	1267	1327	1336	1265	1280			1313	1262	1336	1165	1193	1263	1339	1333	1271	1343
170	1206	1270	1242	1207	1210	1337	1271	1330	1338	1270	1282			1317	1268	1340	1170	1196	1269	1344	1342	1277	1349
180	1210	1274	1249	1212	1214	1341	1274	1334	1343	1270	1286			1318	1272	1345	1171	1201	1273	1347	1348	1282	1355
190	1216	1277	1254	1215	1217	1343	1277	1339	1343	1272	1286			1322	1275	1348	1173	1202	1274	1347	1354	1285	1358
200	1218	1277	1256	1218	1218	1344	1281	1340	1348	1272	1287			1320	1274	1352	1175	1205	1279	1350	1359	1289	1362
210	1221	1281	1262	1219	1219	1347	1282	1344	1348	1275	1284			1323	1279	1353	1173	1206	1279	1352	1361	1291	1363
220	1221	1282	1265	1222	1221	1348	1285	1346	1348	1275	1288			1322	1277	1354	1176	1207	1280	1353	1366	1292	1363
230	1224	1282	1266	1222	1220	1348	1285	1345	1349	1273	1290			1324	1281	1358	1176	1207	1284	1352	1368	1295	1366
240	1225	1282	1270	1223	1214	1349	1287	1348	1350	1275	1290			1324	1281	1359	1176	1205	1284	1354	1371	1295	1365
250	1224	1283	1269	1225	1221	1350	1287	1348	1349	1277	1291			1323	1282	1358	1174	1205	1285	1358	1373	1296	1366
260	1226	1283	1273	1225	1219	1349	1289	1347	1347	1277	1295			1324	1281	1360	1175	1207	1283	1353	1375	1298	1366
270	1226	1285	1273	1226	1220	1348	1287	1347	1349	1276	1290			1324	1281	1359	1175	1206	1284	1352	1376	1296	1368
280	1227	1284	1274	1225	1220	1350	1290	1348	1350	1277	1291			1324	1283	1358	1174	1205	1284	1352	1374	1298	1369
290	1225	1284	1275	1225	1219	1349	1289	1349	1348	1277	1290			1324	1279	1361	1175	1207	1282	1350	1376	1296	1369
300	1225	1284	1275	1225	1220	1348	1288	1349	1349	1275	1291			1324	1282	1358	1175	1206	1285	1349	1378	1298	1367
400	1224	1281	1273	1225	1218	1348	1292	1348	1350	1275	1289			1322	1280	1356	1173	1204	1282	1347	1378	1299	1367
500	1221	1281	1273	1223	1218	1346	1290	1349	1349	1275	1288			1322	1279	1354	1172	1204	1282	1347	1377	1296	1366
600	1220	1281	1273	1222	1216	1343	1290	1348	1348	1273	1286			1318	1276	1355	1171	1201	1280	1355	1375	1294	1363
700	1219	1279	1272	1221	1217	1341	1287	1346	1347	1271	1285			1317	1274	1353	1169	1200	1279	1342	1375	1292	1361
800	1216	1279	1270	1219	1213	1340	1283	1346	1344	1267	1282			1316	1273	1350	1167	1199	1277	1343	1369	1292	1359
900	1215	1276	1267	1218	1215	1338	1285	1342	1344	1269	1281			1315	1271	1349	1164	1195	1273	1341	1372	1291	1358
1	1213	1271	1266	1214	1213	1336	1282	1343	1341	1266	1279			1309	1268	1347	1163	1194	1272	1339	1368	1288	1354
1.1	1211	1272	1265	1214	1211	1334	1282	1341	1340	1263	1277			1309	1267	1344	1162	1190	1269	1343	1363	1289	1354
1.2	1209	1270	1262	1212	1209	1332	1276	1338	1336	1262	1276			1305	1265	1342	1159	1190	1266	1334	1362	1288	1351
1.3	1208	1268	1260	1211	1209	1331	1274	1336	1335	1260	1274			1305	1263	1341	1158	1186	1266	1331	1361	1287	1348
1.4	1204	1266	1259	1209	1206	1326	1276	1333	1333	1257	1273			1300	1259	1340	1156	1184	1263	1328	1358	1283	1347
1.5	1204	1265	1258	1208	1204	1324	1274	1331	1328	1255	1271			1301	1260	1337	1154	1181	1260	1327	1357	1283	1346
1.6	1201	1262	1257	1205	1200	1324	1272	1330	1328	1253	1269			1299	1259	1336	1153	1181	1258	1324	1353	1279	1344
1.7	1198	1259	1253	1202	1199	1321	1271	1327	1327	1252	1267			1297	1255	1334	1150	1179	1256	1323	1353	1276	1341
1.8	1199	1259	1253	1199	1199	1318	1269	1327	1319	1250	1265			1294	1256	1332	1149	1178	1254	1320	1352	1280	1339
1.9	1195	1256	1250	1200	1196	1315	1268	1322	1323	1248	1262			1291	1254	1330	1145	1174	1252	1319	1349	1277	1337
2	1193	1252	1251	1198	1195	1314	1265	1322	1322	1247	1262			1292	1252	1328	1145	1172	1249	1315	1348	1275	1335

## Sheet: DCMU
	DCMU
Time	File 1	File 2	File 3	File 4	File 5	File 6	File 7	File 8	File 9	File 10	File 11	File 12	File 13	File 14	File 15
0.01	298	324	272	420	388	326	393	303	583	440	251	274	391	256	275
0.02	302	331	277	426	398	326	400	308	583	447	254	278	399	261	278
0.03	310	341	287	434	407	336	410	320	598	459	262	284	410	271	284
0.04	316	354	297	448	418	346	424	327	614	476	267	292	422	273	296
0.05	325	366	308	457	430	357	435	338	628	486	278	300	436	283	300
0.06	336	383	323	467	442	367	451	349	642	502	287	313	448	289	309
0.07	350	391	336	479	452	383	465	359	655	516	294	317	464	298	316
0.08	363	405	348	492	470	388	480	372	671	531	303	326	478	307	326
0.09	371	419	361	503	481	401	495	383	685	547	314	336	494	321	335
0.1	381	433	374	519	495	414	508	396	698	563	319	345	507	325	348
0.11	394	448	389	525	508	428	519	409	712	577	332	356	523	335	353
0.12	406	465	405	540	521	440	538	422	727	593	342	369	540	343	364
0.13	422	476	419	551	531	457	553	433	738	609	351	374	555	353	372
0.14	433	490	432	563	547	465	567	447	753	624	360	385	572	363	382
0.15	443	504	446	572	559	478	581	461	766	640	370	394	589	373	391
0.16	454	517	459	586	572	491	595	471	778	656	375	405	605	380	404
0.17	467	530	472	598	585	504	605	481	790	668	388	415	619	390	408
0.18	482	545	486	610	597	516	623	494	803	682	397	428	636	398	418
0.19	497	555	499	621	609	532	634	505	815	695	404	434	645	407	428
0.2	500	568	511	633	627	540	647	515	824	711	412	445	664	415	435
0.21	510	580	523	644	632	553	658	527	838	722	421	454	680	421	443
0.22	523	591	535	657	645	565	672	537	848	735	422	462	695	432	449
0.23	536	604	545	665	655	575	682	547	856	748	437	473	709	441	460
0.24	542	615	557	677	667	587	695	557	868	761	443	482	723	448	467
0.25	554	625	562	685	677	601	705	568	880	773	452	490	731	456	475
0.26	562	636	579	696	693	608	716	578	887	782	458	499	749	463	483
0.27	573	646	590	706	698	620	726	583	898	796	466	508	763	466	490
0.28	584	655	599	720	708	631	737	595	906	804	472	516	777	478	497
0.29	594	666	609	724	718	642	745	604	915	818	482	525	788	485	503
0.3	604	677	618	735	728	651	759	613	922	828	485	535	801	491	510
0.4	680	752	695	816	811	739	838	688	993	917	538	602	907	550	566
0.5	742	811	757	879	877	816	907	745	1050	990	583	658	993	596	612
0.6	789	859	801	930	931	873	958	791	1089	1050	618	708	1061	631	651
0.7	826	896	834	973	973	920	1001	829	1118	1094	647	745	1112	667	681
0.8	862	927	862	1007	1011	962	1039	859	1148	1133	671	772	1160	692	704
0.9	887	950	884	1030	1041	994	1065	886	1171	1160	689	805	1196	715	727
1	912	967	897	1056	1064	1015	1090	904	1182	1185	705	826	1225	733	745
1.1	927	1002	916	1077	1085	1041	1109	916	1201	1204	721	845	1249	747	755
1.2	946	998	924	1092	1106	1054	1128	935	1211	1222	730	863	1270	759	770
1.3	956	1004	934	1106	1117	1074	1138	946	1223	1236	741	876	1285	772	782
1.4	965	1016	940	1115	1126	1087	1154	955	1233	1249	745	887	1297	778	789
1.5	970	1022	944	1124	1139	1095	1163	961	1237	1261	753	899	1309	784	800
1.6	980	1028	947	1134	1148	1103	1173	966	1242	1266	756	904	1317	792	803
1.7	984	1032	950	1139	1154	1112	1181	973	1249	1274	760	913	1326	796	806
1.8	989	1034	952	1147	1160	1115	1182	979	1253	1278	763	916	1331	799	808
1.9	995	1037	955	1148	1162	1119	1190	975	1255	1284	764	922	1338	801	814
2	993	1040	955	1155	1169	1120	1196	982	1260	1291	765	924	1339	807	817
2.1	996	1040	956	1159	1173	1124	1197	985	1261	1293	767	929	1343	806	820
2.2	997	1043	951	1158	1173	1125	1200	987	1259	1297	767	930	1346	809	824
2.3	999	1042	955	1161	1178	1127	1203	990	1265	1301	765	933	1348	812	823
2.4	999	1044	957	1164	1178	1126	1205	990	1261	1301	767	937	1349	812	827
2.5	999	1046	955	1220	1182	1127	1207	992	1267	1307	768	938	1352	811	830
2.6	1001	1045	956	1167	1184	1131	1208	995	1270	1304	767	939	1355	814	830
2.7	996	1047	955	1168	1184	1127	1212	994	1269	1308	769	943	1353	817	834
2.8	1000	1046	956	1169	1187	1128	1211	997	1272	1310	767	941	1354	816	835
2.9	1002	1044	958	1171	1187	1129	1213	996	1274	1311	767	945	1356	818	837
3	999	1048	952	1173	1188	1128	1213	999	1273	1315	769	944	1355	821	840
4	1006	1055	967	1180	1199	1127	1225	1014	1281	1325	779	955	1362	835	861
5	1018	1068	980	1188	1211	1137	1239	1032	1286	1333	796	968	1371	853	888
6	1031	1081	991	1194	1222	1149	1256	1047	1291	1340	816	984	1380	872	911
7	1046	1093	1001	1202	1231	1159	1266	1060	1295	1349	832	999	1384	885	930
8	1055	1103	1007	1207	1238	1167	1278	1067	1296	1349	848	1009	1391	895	947
9	1062	1106	1010	1208	1241	1173	1286	1074	1297	1356	860	1018	1394	906	964
10	1065	1113	1011	1209	1245	1176	1294	1079	1299	1354	869	1025	1395	915	977
11	1068	1116	1014	1209	1245	1182	1297	1083	1299	1357	881	1032	1396	922	993
12	1075	1120	1019	1213	1249	1185	1301	1088	1301	1357	890	1037	1397	930	1007
13	1081	1122	1023	1213	1251	1187	1306	1094	1299	1358	900	1043	1396	938	1022
14	1084	1129	1027	1215	1253	1190	1310	1097	1303	1358	912	1051	1398	948	1038
15	1089	1132	1030	1214	1254	1192	1313	1103	1304	1363	923	1057	1399	957	1052
16	1095	1136	1033	1218	1258	1195	1317	1110	1303	1363	934	1063	1399	966	1068
17	1101	1142	1036	1219	1259	1199	1322	1112	1306	1364	946	1068	1401	975	1081
18	1105	1145	1038	1220	1262	1201	1325	1120	1305	1366	959	1074	1400	983	1094
19	1108	1148	1042	1219	1262	1204	1329	1124	1306	1366	969	1078	1401	992	1108
20	1116	1154	1047	1223	1264	1208	1333	1128	1305	1368	980	1083	1404	999	1119
21	1120	1156	1050	1221	1265	1210	1338	1135	1305	1368	990	1088	1405	1007	1131
22	1123	1162	1052	1225	1270	1211	1341	1140	1306	1370	1001	1095	1404	1015	1141
23	1129	1165	1055	1224	1270	1214	1346	1141	1306	1371	1011	1101	1407	1022	1151
24	1131	1170	1057	1226	1273	1218	1347	1149	1308	1372	1019	1105	1407	1028	1161
25	1137	1174	1061	1227	1273	1219	1350	1153	1309	1372	1028	1107	1407	1035	1169
26	1141	1178	1060	1228	1275	1224	1355	1155	1308	1375	1036	1114	1408	1042	1178
27	1146	1181	1065	1228	1276	1226	1358	1161	1309	1374	1043	1117	1409	1047	1185
28	1147	1181	1067	1231	1277	1230	1359	1164	1310	1375	1052	1119	1407	1054	1192
29	1150	1187	1068	1228	1280	1232	1364	1167	1307	1376	1059	1124	1409	1060	1200
30	1157	1191	1074	1231	1280	1232	1368	1172	1310	1375	1067	1126	1407	1066	1206
40	1191	1218	1093	1236	1293	1252	1392	1207	1313	1384	1122	1156	1414	1109	1254
50	1217	1242	1110	1244	1305	1269	1406	1236	1314	1389	1163	1180	1414	1144	1288
60	1242	1263	1129	1252	1318	1285	1424	1264	1316	1398	1196	1200	1417	1173	1317
70	1264	1282	1144	1260	1332	1297	1436	1288	1319	1405	1227	1223	1420	1201	1344
80	1283	1300	1164	1269	1343	1316	1451	1309	1320	1415	1253	1246	1427	1223	1370
90	1303	1315	1182	1280	1361	1330	1461	1331	1321	1424	1280	1270	1437	1245	1394
100	1323	1333	1200	1291	1379	1345	1470	1350	1324	1432	1301	1288	1446	1269	1417
110	1339	1348	1215	1304	1392	1364	1481	1368	1327	1444	1323	1310	1459	1287	1433
120	1353	1363	1230	1316	1409	1378	1494	1383	1331	1456	1341	1327	1468	1305	1452
130	1364	1372	1243	1328	1424	1394	1503	1397	1333	1465	1356	1342	1481	1318	1466
140	1378	1385	1254	1341	1435	1406	1513	1407	1339	1475	1366	1356	1491	1329	1476
150	1384	1394	1262	1352	1450	1417	1522	1417	1343	1483	1377	1366	1501	1339	1485
160	1395	1402	1271	1362	1459	1429	1528	1424	1346	1490	1383	1374	1511	1347	1488
170	1401	1407	1278	1369	1467	1436	1536	1432	1351	1497	1390	1384	1517	1354	1495
180	1405	1412	1282	1376	1476	1447	1544	1436	1355	1505	1390	1389	1529	1358	1497
190	1414	1416	1284	1386	1483	1452	1548	1440	1359	1511	1395	1395	1535	1361	1500
200	1416	1421	1289	1391	1487	1459	1553	1442	1363	1516	1397	1400	1541	1365	1502
210	1420	1424	1292	1399	1492	1462	1559	1445	1367	1520	1397	1402	1546	1366	1502
220	1423	1424	1293	1403	1497	1466	1561	1448	1369	1524	1397	1404	1551	1368	1503
230	1424	1428	1295	1408	1500	1469	1564	1448	1374	1525	1397	1406	1554	1369	1502
240	1427	1426	1296	1412	1502	1473	1567	1449	1377	1531	1399	1406	1565	1369	1503
250	1426	1427	1294	1415	1505	1474	1568	1448	1380	1531	1399	1407	1561	1369	1501
260	1427	1429	1295	1418	1505	1476	1571	1449	1381	1535	1399	1409	1565	1369	1502
270	1427	1431	1297	1420	1506	1476	1572	1451	1383	1537	1399	1407	1568	1369	1502
280	1428	1429	1296	1420	1507	1479	1573	1451	1387	1537	1397	1408	1567	1377	1502
290	1430	1429	1297	1422	1507	1476	1574	1451	1388	1537	1397	1408	1572	1369	1501
300	1428	1430	1297	1424	1509	1479	1574	1448	1390	1539	1396	1410	1573	1368	1500
400	1428	1430	1299	1431	1507	1479	1575	1450	1402	1545	1395	1409	1580	1367	1499
500	1425	1427	1304	1429	1506	1476	1576	1448	1407	1548	1393	1407	1578	1364	1497
600	1423	1425	1305	1428	1507	1474	1573	1447	1408	1547	1391	1406	1578	1364	1494
700	1422	1412	1306	1429	1504	1471	1569	1445	1407	1545	1389	1403	1578	1361	1493
800	1418	1408	1299	1426	1501	1469	1570	1443	1408	1548	1389	1401	1577	1358	1490
900	1416	1417	1296	1426	1502	1466	1567	1440	1410	1545	1384	1399	1574	1357	1485
1	1415	1414	1292	1423	1498	1464	1566	1439	1410	1541	1384	1398	1573	1355	1486													1
1.1	1413	1413	1291	1421	1497	1461	1562	1435	1406	1543	1381	1393	1571	1351	1482													1.1
1.2	1410	1412	1288	1422	1497	1460	1559	1435	1408	1540	1376	1393	1572	1348	1478													1.2
1.3	1407	1410	1287	1419	1494	1457	1560	1433	1409	1539	1374	1391	1570	1346	1467													1.3
1.4	1406	1406	1285	1419	1493	1457	1557	1431	1406	1535	1371	1387	1568	1343	1473													1.4
1.5	1401	1406	1285	1417	1491	1453	1557	1429	1406	1533	1367	1386	1566	1340	1464													1.5
1.6	1400	1401	1282	1416	1489	1453	1553	1428	1405	1531	1361	1383	1565	1338	1466													1.6
1.7	1400	1401	1281	1412	1486	1451	1552	1425	1404	1514	1356	1383	1561	1334	1466													1.7
1.8	1400	1400	1279	1411	1486	1449	1552	1423	1404	1517	1353	1381	1561	1333	1461													1.8
1.9	1396	1399	1278	1411	1485	1446	1549	1421	1403	1515	1350	1378	1559	1331	1459													1.9
2	1395	1398	1273	1408	1484	1445	1546	1420	1402	1517	1351	1378	1558	1329	1457													2
